# Supplementary material for: Acridine based metal–organic framework host–guest featuring efficient photoelectrochemical-type photodetector and white LED
Source: Royal Society of Chemistry journal article supplement (doi:10.1039/d2dt01649d), 2022-01-01
Supplement: d2dt01649d2.pdf [file d2dt01649d2.pdf]

**Electronic Supplementary Information**

**Acridine based metal-organic framework host-guest featuring  
efficient photoelectrochemical-type photodetector and white LED**

Hua-Rui Wang,<sup>a</sup> Xu-Ke Tian,<sup>ab</sup> Ji-Rui Zhang,<sup>a</sup> Meng-Yao Wen,<sup>a</sup> and Xiao-Gang Yang,<sup>\*a</sup>

<sup>a</sup>College of Chemistry and Chemical Engineering, Luoyang Normal University, Henan Key Laboratory of Function-Oriented Porous Materials, Luoyang 471934, P. R. China.

<sup>b</sup>College of Chemistry and Chemical Engineering, Henan Normal University, Xinxiang, 453007, P. R. China.

\*Corresponding author

Tel.: 86-379-68618328, Fax: 86-20-68618320.

E-mail: yxg2233@126.com

## **Experimental section**

### **1. Materials and general methods**

5-ethoxyisophthalic acid (EtOIPA), cadmium acetate and acridine (AD) were bought from commercial providers and used without further purification. The Powder X-ray diffraction (PXRD) analyses were recorded on a RigakuDmax2500 diffractometer with Cu-K $\alpha$  radiation in arrange of 5–50° with a scan speed of 10 °/minute. Thermo gravimetric analyses (TGA) were conducted from room temperature to 800 °C using TG/DTA 6300 simultaneous thermal analyzer under a air atmosphere at a heating rate of 10 °C/min. The UV–vis absorption spectrum were measured on UH4150 spectrophotometer with a slit of 6 nm. Fourier transform infrared spectroscopy (KBr pellets) were measured on a Magna 750 FT-IR spectrophotometer in the 4000-400 cm<sup>-1</sup> wavelength range. Room temperature photoluminescence spectra, quantum yield and time-resolved lifetime were tested on an Edinburgh FLS1000 fluorescence spectrometer equipped with time-resolved single photon counting-multi-channel scaling (MCS) mode. The morphology of the title MOF coated ITO film was investigated by a field emission scanning electron microscope (SEM Sigma 500). The current–voltage characteristic of the LED device was detected by Keithley 2400 source meter with the increase of voltage from 0 to 9 V. The photoluminescence spectrum of the LED device can be obtained from Edinburgh FLS1000 fluorescence spectrometer with the Keithley 2400 source meter as additional power source.

Photoelectrochemical (PEC)-type photodetector were measured by a CHI 660E

electrochemical workstation in a standard three-electrode system with 0.5 M Na<sub>2</sub>SO<sub>4</sub> aqueous solution, MOF coated indiumtin oxide (ITO) glass, platinum wire and Ag/AgCl as electrolyte, working electrode, counter electrode, and reference electrode, respectively. The cyclic voltammograms (CV) was tested in a voltage range of -0.6 to 0.6 V vs Ag/AgCl with scan rate of 50 mV/s. The transient current density–time curves were recorded under the periodically discontinuous 300 W Xe lamp illumination at a bias potential of 0 and -0.5 V. Electrochemical impedance spectroscopy (EIS) Nyquist plots were obtained at the potential of 0 V and -0.5 V potential in three-electrode system. The wavelength-dependent photocurrent was tested by a photoelectrochemical analyzer equipped with a Omni-λ150 monochromator by using above three-electrode system in 0.5 M Na<sub>2</sub>SO<sub>4</sub> aqueous solution.

## **2. Syntheses of [Cd<sub>3</sub>(EtOIPA)<sub>4</sub>(HAD)<sub>2</sub>]H<sub>2</sub>O (1)**

A mixture of 5-ethoxyisophthalic acid (0.2 mmol, 0.0420 g), acridine (0.1 mmol, 0.0179 g), cadmium acetate (0.5 mmol, 0.1332 g) and deionized water (8ml) was sealed in a Teflon-lined stainless steel vessel, heated to 120 °C for 48 h. After cooling to room-temperature naturally, yellow sheet crystals **1** were washed several times with deionized water and dried in air. Yield: 50% (based on Cd). IR (KBr pellet, cm<sup>-1</sup>): 3468 m, 3087 w, 2985 w, 2904 w, 2380 w, 1661 w, 1579 s, 1448 m, 1382 s, 1318 m, 1266 m, 1116 m, 1056 s, 889 m, 779 s, 723 s, 603 w, 457 m.

## **3. Preparation of the LED device**

A mixture of MOF powders (50 mg) as phosphor and organic silica gel (about 2 mL)

as binder was stirred for 5 min, and then carefully coated on a commercially available 460 nm blue LED. The device was heated at 100 °C for 2 h.

#### 4. X-ray crystal structure

Single-crystal X-ray diffraction data for  $[\text{Cd}_3(\text{EtOIPA})_4(\text{HAD})_2]\cdot\text{H}_2\text{O}$  (**1**) were collected at normal temperature (293K) on an Oxford Diffraction SuperNova area-detector diffractometer with mirror optics monochromated Mo  $K\alpha$  radiation ( $\lambda = 0.71073 \text{ \AA}$ ). The data collection, data reduction and empirical absorption correction were conducted by CrysAlisPro.<sup>1</sup> The crystal structure were solved by direct methods, using SHELXS-2014 and least-squares refined with SHELXL-2014, and using anisotropic thermal displacement parameters for all non-hydrogen atoms.<sup>2,3</sup> The crystallographic data and selected bond length/angle for  $[\text{Cd}_3(\text{EtOIPA})_4(\text{HAD})_2]\cdot\text{H}_2\text{O}$  (**1**) were listed in Table S1. The CIF file of  $[\text{Cd}_3(\text{EtOIPA})_4(\text{HAD})_2]\cdot\text{H}_2\text{O}$  (**1**) (CCDC No. 2174954) can be gained free of charge via <http://www.ccdc.cam.ac.uk/conts/retrieving.html>.

**Table S1.** Crystallographic data for **1**.

| MOF                                                                         | <b>1</b>                                                                       |
|-----------------------------------------------------------------------------|--------------------------------------------------------------------------------|
| Formula                                                                     | C <sub>65</sub> H <sub>54</sub> Cd <sub>3</sub> N <sub>2</sub> O <sub>21</sub> |
| Formula weight                                                              | 1550.31                                                                        |
| Crystal system                                                              | Triclinic                                                                      |
| Space group                                                                 | <i>P</i> $\bar{1}$                                                             |
| <i>a</i> (Å)                                                                | 10.3911(4)                                                                     |
| <i>b</i> (Å)                                                                | 17.2576(7)                                                                     |
| <i>c</i> (Å)                                                                | 19.1393(7)                                                                     |
| $\alpha$ (°)                                                                | 108.185(3)                                                                     |
| $\beta$ (°)                                                                 | 100.971(3)                                                                     |
| $\gamma$ (°)                                                                | 107.234(3)                                                                     |
| <i>V</i> (Å <sup>3</sup> )                                                  | 2959.3(2)                                                                      |
| <i>Z</i>                                                                    | 2                                                                              |
| <i>D<sub>c</sub></i> (g cm <sup>-3</sup> )                                  | 1.740                                                                          |
| $\mu$ (mm <sup>-1</sup> )                                                   | 1.153                                                                          |
| <i>R</i> <sub>int</sub>                                                     | 0.0267                                                                         |
| Goof                                                                        | 1.195                                                                          |
| <i>R</i> <sub>1</sub> / <i>wR</i> <sub>2</sub> [ <i>I</i> > 2σ( <i>I</i> )] | 0.0467/0.1096                                                                  |
| <i>R</i> <sub>1</sub> / <i>wR</i> <sub>2</sub> (all data)                   | 0.0568/0.1142                                                                  |

**Table S2.** Selected bond length/angle for **1**.

| Atoms     | Length/Å | Atoms     | Length/Å |
|-----------|----------|-----------|----------|
| Cd1–O1    | 2.560(4) | Cd1–O2    | 2.257(3) |
| Cd1–O6    | 2.216(4) | Cd1–O8#1  | 2.402(4) |
| Cd1–O9#1  | 2.354(4) | Cd1–O11   | 2.235(4) |
| Cd2–O2#2  | 2.326(3) | Cd2–O2    | 2.326(3) |
| Cd2–O7#2  | 2.273(3) | Cd2–O7    | 2.273(3) |
| Cd2–O12   | 2.220(4) | Cd2–O12#2 | 2.220(4) |
| Cd3–O4#2  | 2.428(4) | Cd3–O4#5  | 2.428(4) |
| Cd3–O14   | 2.234(3) | Cd3–O14#6 | 2.234(3) |
| Cd3–O16   | 2.218(3) | Cd3–O16#6 | 2.218(3) |
| Cd4–O4#7  | 2.269(4) | Cd4–O13#4 | 2.311(4) |
| Cd4–O14#4 | 2.496(3) | Cd4–O17#1 | 2.240(4) |
| Cd4–O19   | 2.233(4) | Cd4–O18   | 2.491(4) |

  

| Atoms         | Angle/°    | Atoms         | Angle/°    |
|---------------|------------|---------------|------------|
| O1–Cd1–O18#1  | 88.51(14)  | O2–Cd1–O1     | 53.55(12)  |
| O2–Cd1–O8#1   | 99.33(13)  | O2–Cd1–O9#1   | 139.25(13) |
| O2–Cd1–O18#1  | 121.14(14) | O6–Cd1–O1     | 97.20(15)  |
| O6–Cd1–O2     | 109.81(14) | O6–Cd1–O8#1   | 146.56(13) |
| O6–Cd1–O9#1   | 91.89(13)  | O6–Cd1–O11    | 94.39(15)  |
| O6–Cd1–O18#1  | 119.12(15) | O8#1–Cd1–O1   | 86.92(14)  |
| O9#1–Cd1–O1   | 90.83(14)  | O11–Cd1–O2    | 107.60(14) |
| O11–Cd1–O1    | 160.48(14) | O11–Cd1–O9#1  | 104.46(15) |
| O11–Cd1–O8#1  | 92.02(15)  | O2#2–Cd2–O2   | 180.0      |
| O11–Cd1–O18#1 | 99.50(15)  | O7#2–Cd2–O2   | 92.27(13)  |
| O7–Cd2–O2#2   | 92.26(13)  | O7#2–Cd2–O2#2 | 87.74(13)  |
| O7–Cd2–O2     | 87.74(13)  | O12–Cd2–O2    | 82.00(14)  |
| O7–Cd2–O7#2   | 180.0      | O12–Cd2–O2#2  | 98.00(14)  |

Symmetry codes for #1: 1+X, Y, Z; #2: 1-X, 1-Y, 1-Z; #3: -1+X, Y, Z; #4: 1-X, -Y, -Z; #5: -1+X, -1+Y, -1+Z; #6: -X, -Y, -Z; #7: 2-X, 1-Y, 1-Z.

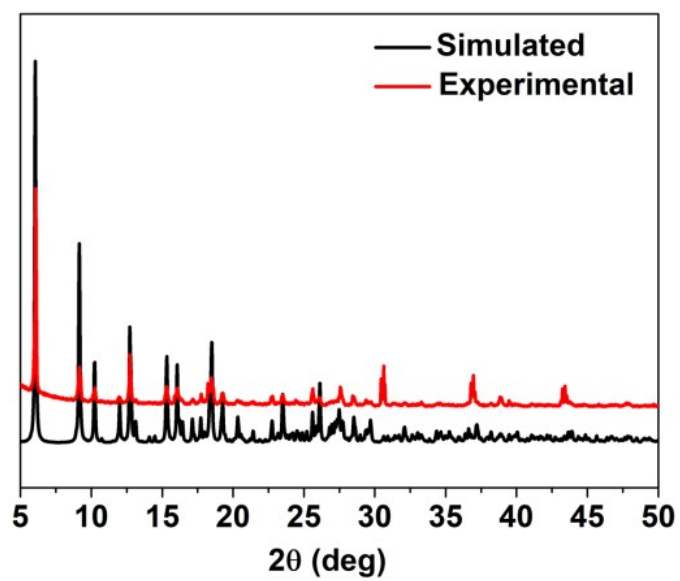

**Figure S1.** PXRD patterns of  $[\text{Cd}_3(\text{EtOIPA})_4(\text{HAD})_2] \cdot \text{H}_2\text{O}$  (**1**).

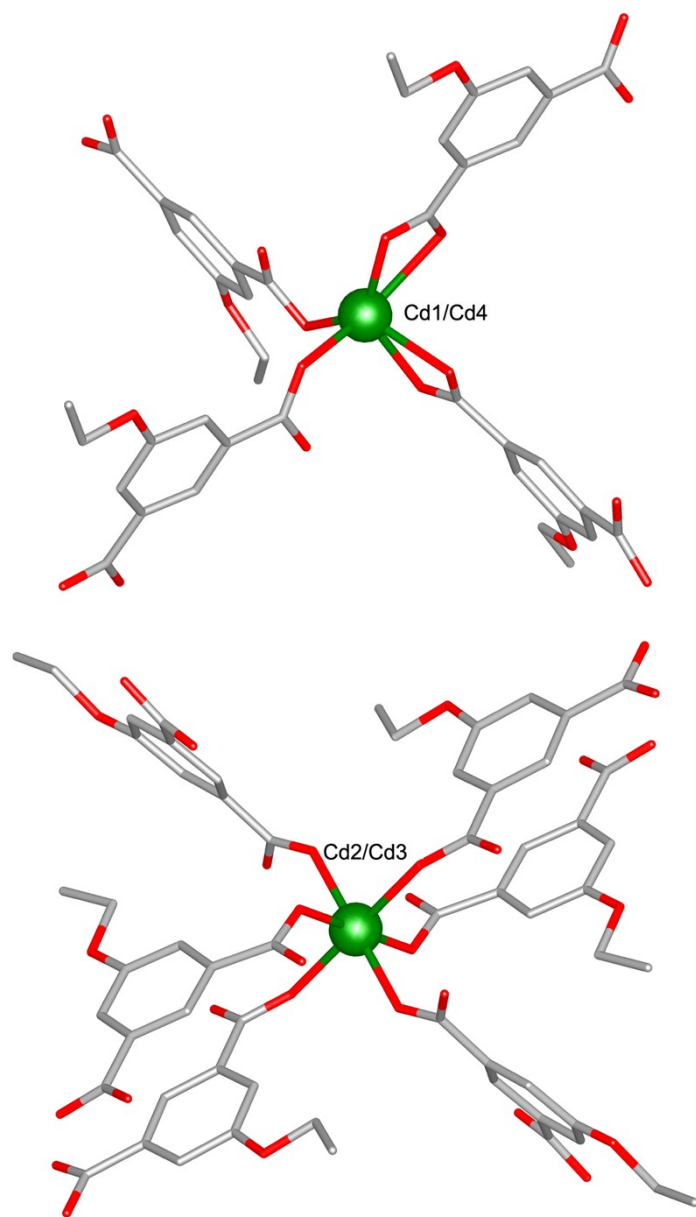

**Figure S2.** Coordination environments of four independent Cd(II) ions in **1**.



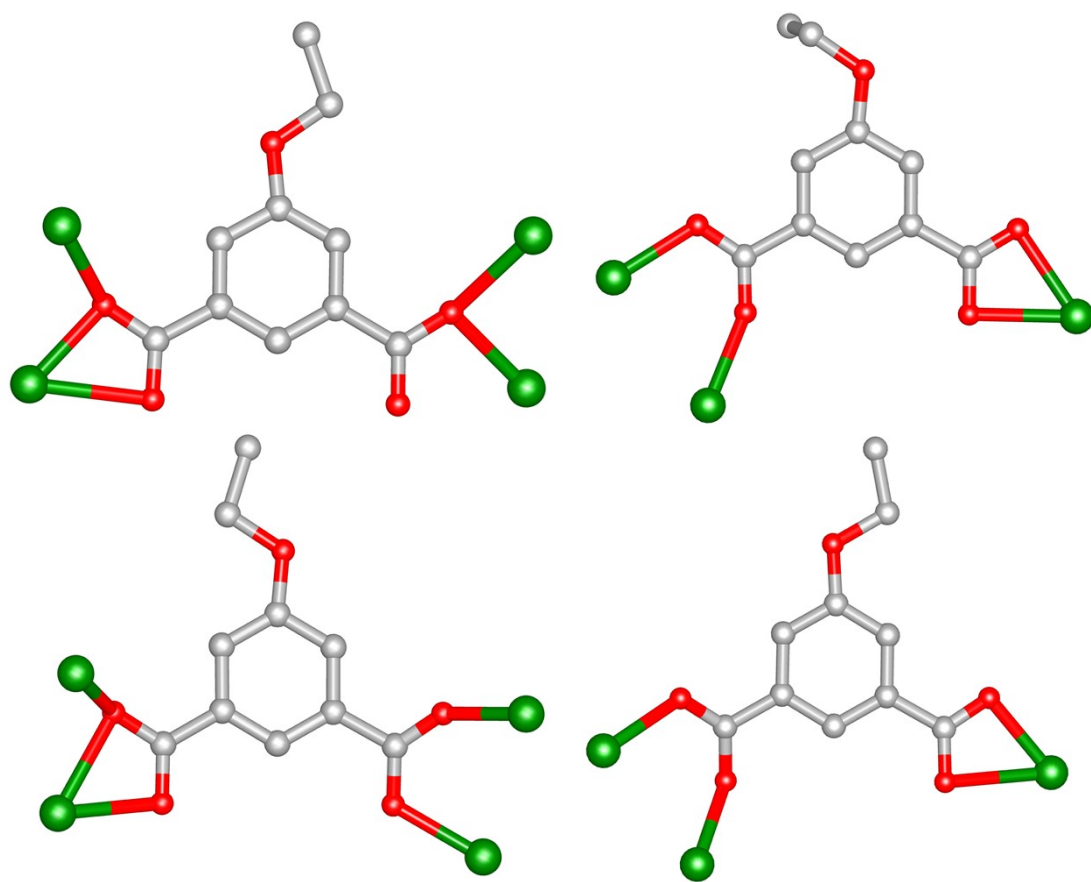

**Figure S3.** Coordination modes of EtOIPA ligand in **1**.

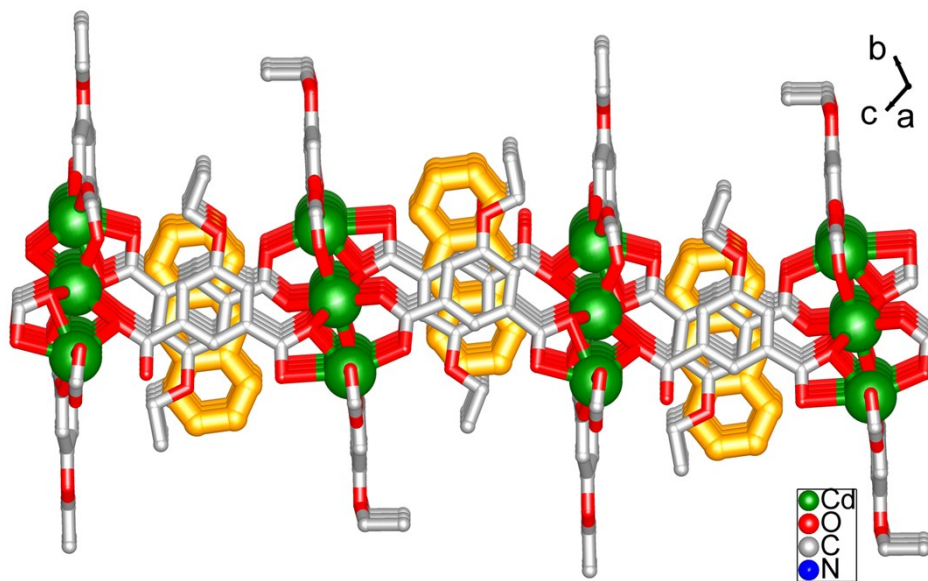

**Figure S4.** View of the 2D network of **1** along a direction with protonated AD guests loaded in each grids in **1**.

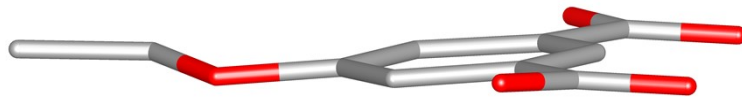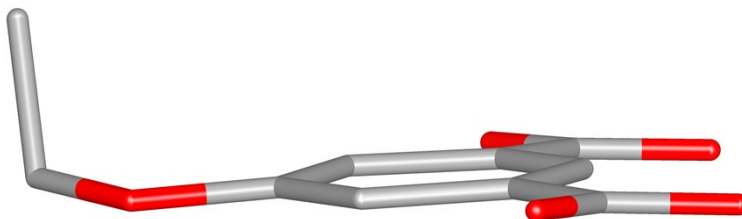

**Figure S5.** Steric configuration of EtOIPA ligand in **1**.

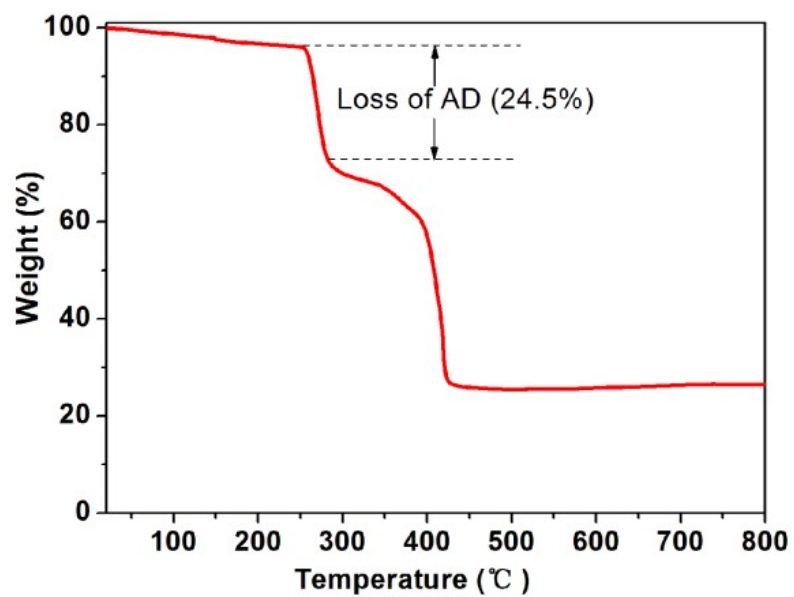

**Figure S6.** Thermo gravimetric analysis curve of  $[\text{Cd}_3(\text{EtOIPA})_4(\text{HAD})_2] \cdot \text{H}_2\text{O}$  (**1**).

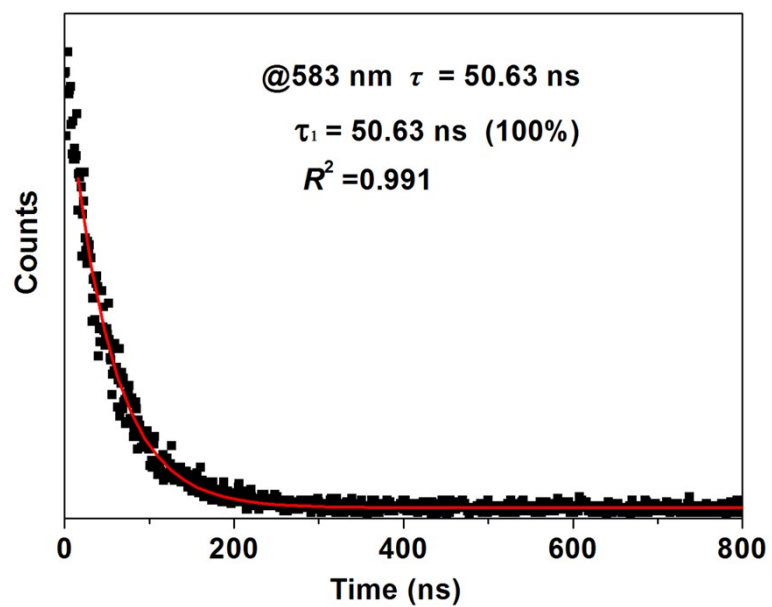

Figure S7. PL decay curve of **1** measured at room temperature.

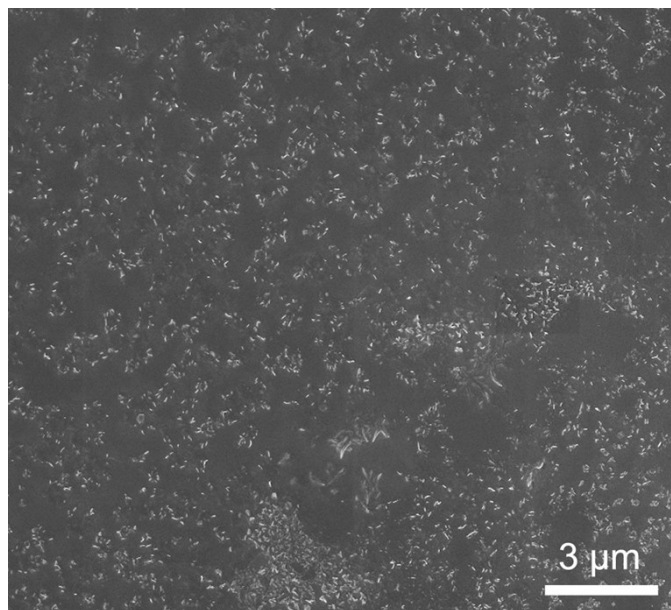

**Figure S8.** SEM image of the title MOF coated ITO film.

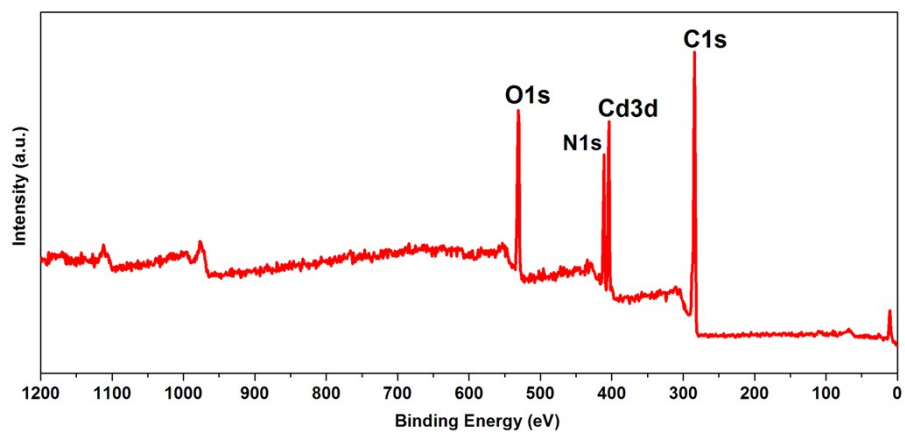

**Figure S9.** XPS spectrum of the MOF coated ITO film after PEC measurements.

## Supporting References

1. CrysAlisPro, Rigaku Oxford Diffraction, Version 1.171.39.6a.
2. G. M. Sheldrick, *Acta Crystallogr. Sect. A* 2008, **64**, 112.
3. (a) B. Delley, *J. Chem. Phys.* 1990, **92**, 508; (b) B. Delley, *J. Chem. Phys.* 2000, **113**, 7756.
